# Supplementary material
Source: PubMed Central journal article supplement (PMC3122205)
Supplement: supp_M110.192260_jbc.M110.192260-2.pdf [file supp_M110.192260_jbc.M110.192260-2.pdf]

**Supplemental Figure 1.** Serum corticosterone concentrations in male *Agtr1a*<sup>+/+</sup> (*n* = 7) and *Agtr1a*<sup>-/-</sup> (*n* = 7) mice on an *ad libitum* diet at 16 weeks of age

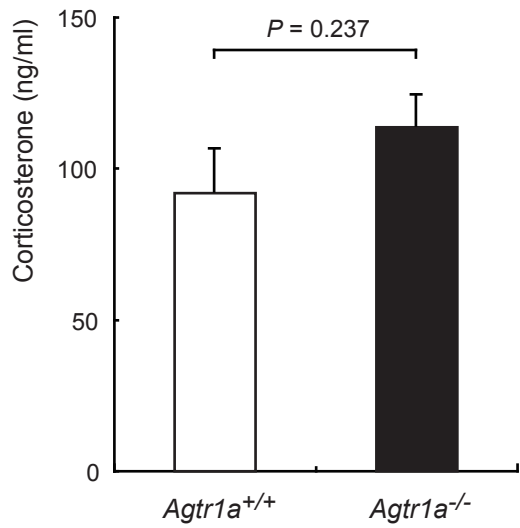

Serum corticosterone concentrations were determined using Corticosterone EIA Kit (Enzo Life Sciences Inc., Farmingdale, NY, USA) according to the manufactures' protocol.
