# Supplementary material
Source: PubMed Central journal article supplement (PMC3122205)
Supplement: supp_M110.192260_jbc.M110.192260-3.pdf [file supp_M110.192260_jbc.M110.192260-3.pdf]

**Supplemental Figure 2.** Expressions of mRNA for Ang II type 1a (*Agtr1a*), type 1b (*Agtr1b*), and type 2 (*Agtr2*) receptors in the hypothalamus of *Agtr1a*<sup>+/+</sup> (*n* = 5) and *Agtr1a*<sup>-/-</sup> (*n* = 7) mice

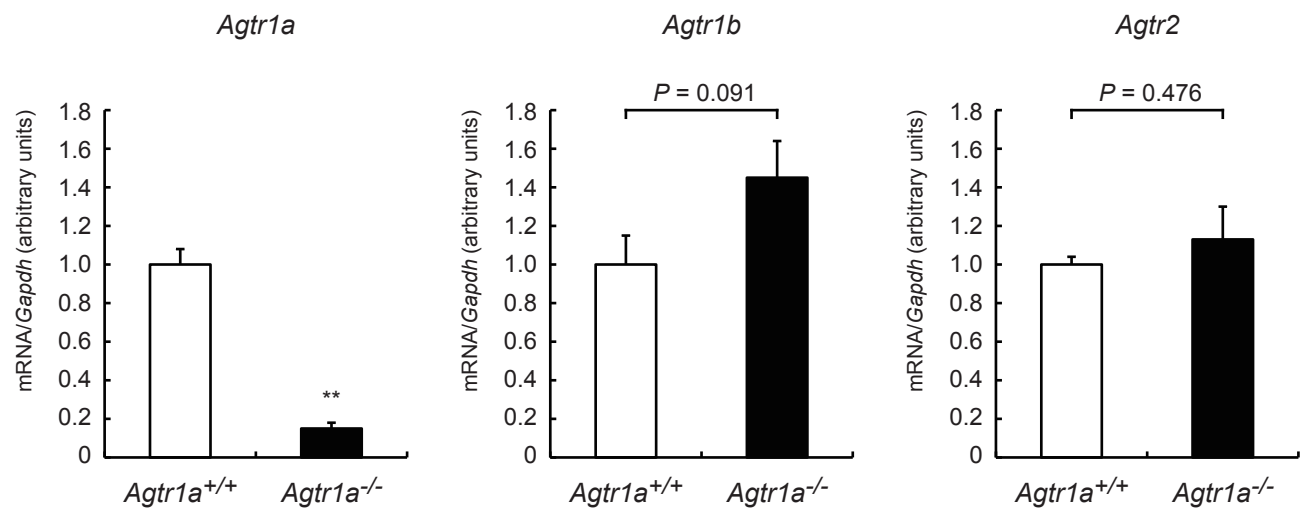

Data are presented as mean  $\pm$  SEM. \*\* *P* < 0.01 versus *Agtr1a*<sup>+/+</sup> mice.
