# Supplementary material
Source: PubMed Central journal article supplement (PMC3122205)
Supplement: supp_M110.192260_jbc.M110.192260-4.pdf [file supp_M110.192260_jbc.M110.192260-4.pdf]

**Supplemental Figure 3.** Food intake and body weight of *Agtr1a*<sup>+/+</sup> and *Agtr1a*<sup>-/-</sup> mice during a high-fat diet

A.

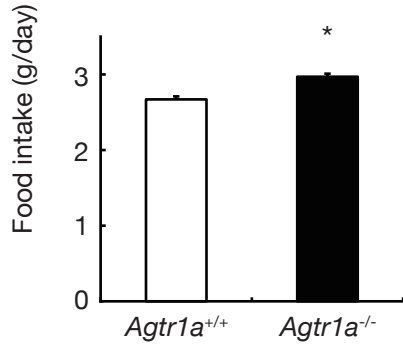

B.

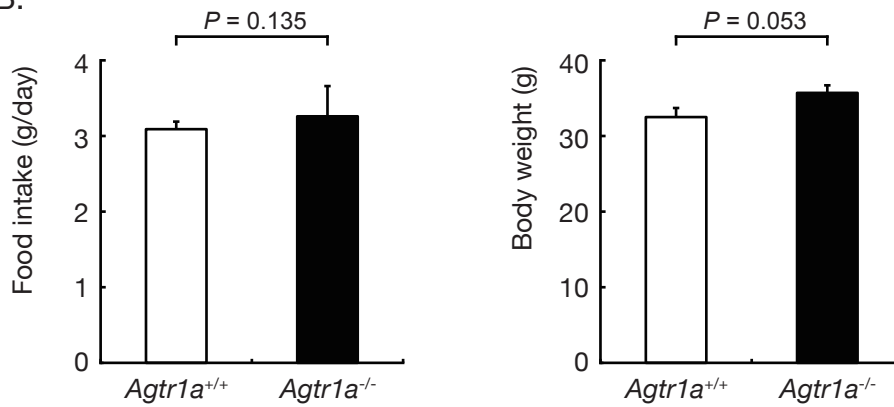

*Agtr1a*<sup>+/+</sup> ( $n = 13$ ) and *Agtr1a*<sup>-/-</sup> ( $n = 11$ ) mice were maintained on a high-fat diet from 6 to 12 weeks of age.

A. Daily food intake of *Agtr1a*<sup>+/+</sup> and *Agtr1a*<sup>-/-</sup> mice during the first week after the initiation of high-fat diet.

Data are presented as mean  $\pm$  SEM. \*  $P < 0.05$  versus *Agtr1a*<sup>+/+</sup> mice.

B. Daily food intake and body weight of *Agtr1a*<sup>+/+</sup> and *Agtr1a*<sup>-/-</sup> mice at 12 weeks of age.

Data are presented as mean  $\pm$  SEM.
