# Supplementary material
Source: PubMed Central journal article supplement (PMC3122205)
Supplement: supp_M110.192260_jbc.M110.192260-5.pdf [file supp_M110.192260_jbc.M110.192260-5.pdf]

**Supplemental Figure 4.** Peripherally administered olmesartan has no effect on food intake and hypothalamic neurocircuits

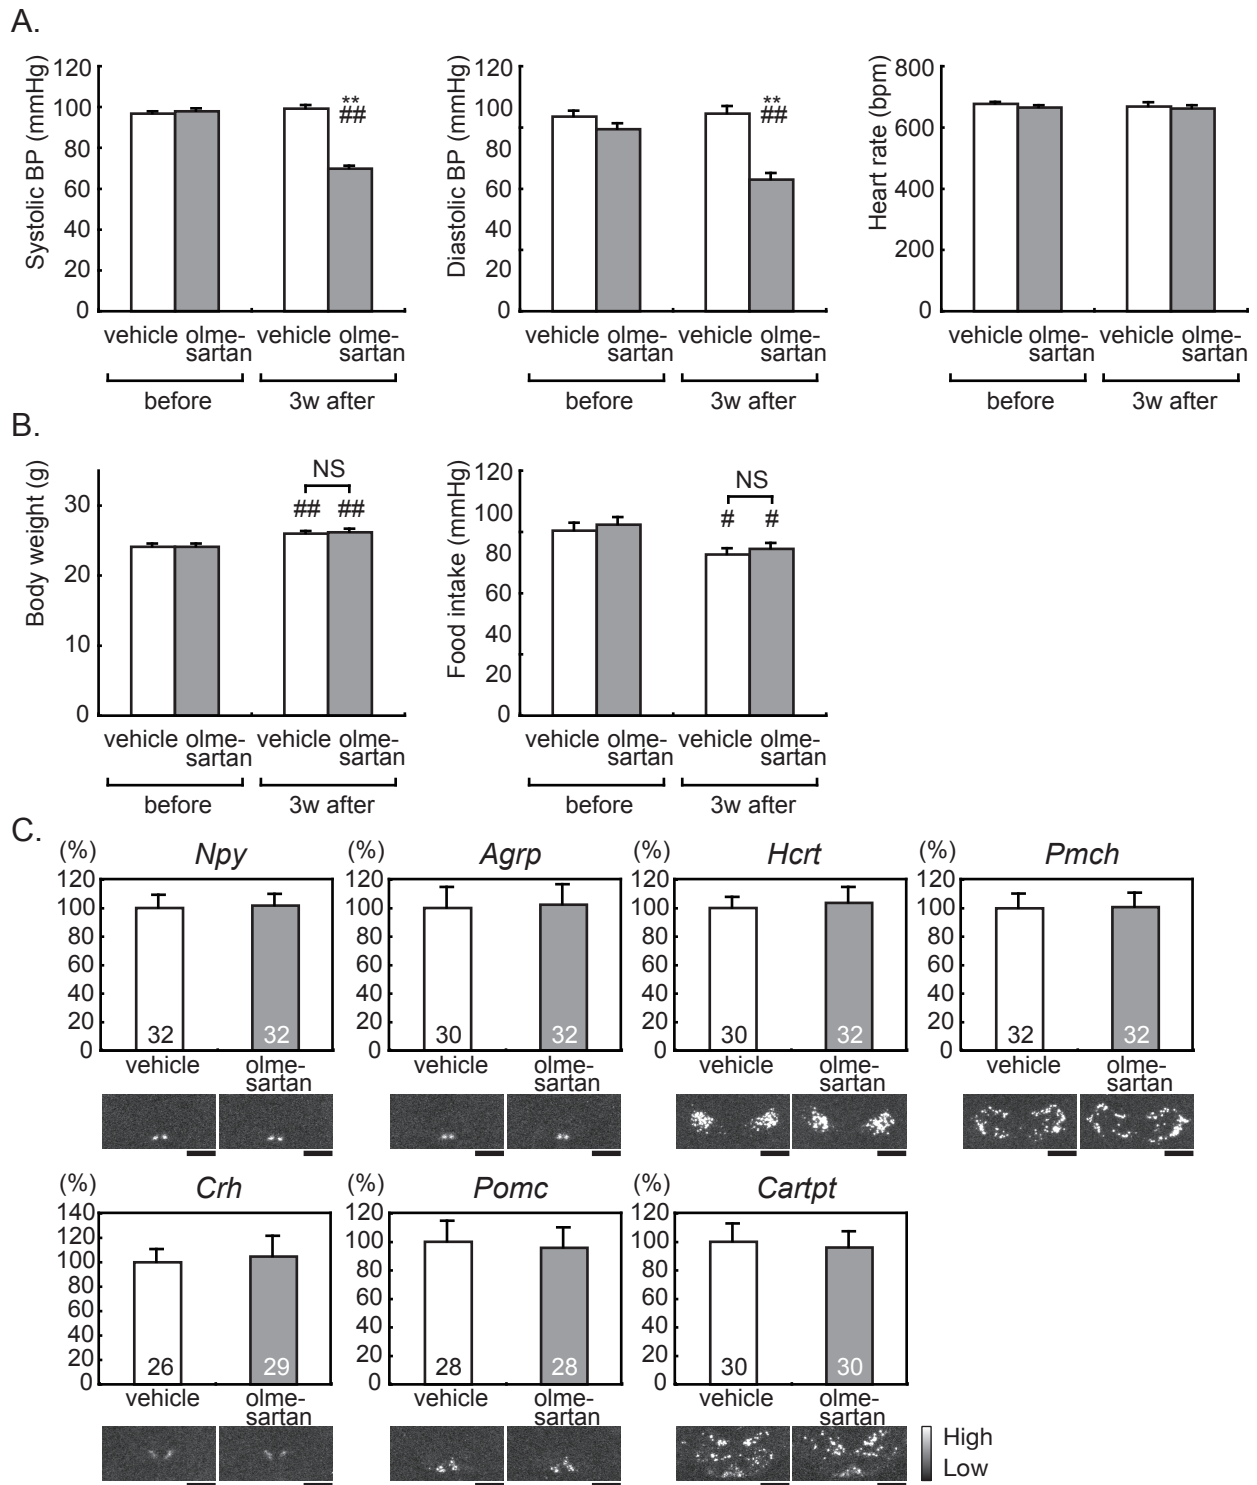

A. Blood pressures and pulse rates in wild-type mice 3 weeks after the administration of vehicle ( $n = 13$ ) or olmesartan ( $n = 13$ ).  $**P < 0.01$  versus vehicle,  $## P < 0.01$  versus before implantation. BP, blood pressure.  
 B. Body weight and daily food intake in wild-type mice 3 weeks after the administration of vehicle ( $n = 13$ ) or olmesartan ( $n = 13$ ).  $# P < 0.05$ ,  $## P < 0.01$  versus before implantation.  
 C. Quantitative *in situ* hybridization analysis of hypothalamic orexigenic and anorexigenic peptides in wild-type mice 3 weeks after the administration of vehicle or olmesartan. Number of sections for each analysis is indicated in the bars. Scale bars, 1 mm.
