# Supplementary material
Source: PubMed Central journal article supplement (PMC3122205)
Supplement: supp_M110.192260_jbc.M110.192260-6.pdf [file supp_M110.192260_jbc.M110.192260-6.pdf]

**Supplemental Figure 5.** I.c.v. administered olmesartan has aperitive effect

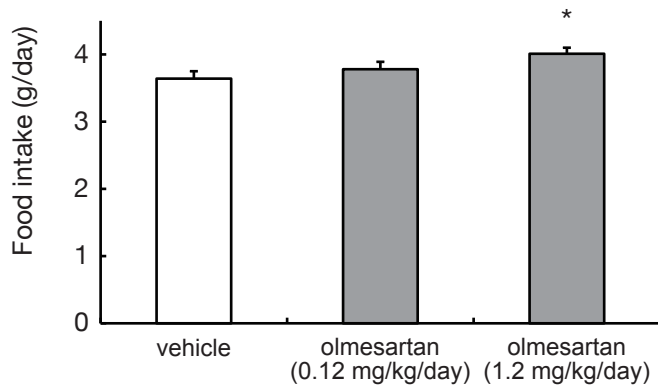

Daily food intake in wild-type mice 2 weeks after the i.c.v. administration of vehicle ( $n = 4$ ), olmesartan (0.12 mg/kg/day)( $n = 5$ ), and olmesartan (1.2 mg/kg/day)( $n = 4$ ). Data are presented as mean  $\pm$  SEM. \*  $P < 0.05$  versus vehicle.
